# Supplementary material for: MiR-148a-3p Promotes Colorectal Cancer Cell Ferroptosis by Targeting SLC7A11
Source: MDPI journal article supplement (doi:10.3390/cancers15174342), 2023-08-30
Supplement: s1 [file s1]

# **MiR-148a-3p promotes colorectal cancer cell ferroptosis by targeting SLC7A11**

Elisa Martino <sup>1</sup>, Anna Balestrieri <sup>2</sup>, Francesca Aragona <sup>3</sup>, Giovanna Bifulco<sup>3</sup>, Luigi Mele <sup>4</sup>, Giuseppe Campanile <sup>3</sup>, Maria Luisa Balestrieri <sup>1,\*</sup> and Nunzia D'Onofrio <sup>1</sup>

<sup>1</sup>Department of Precision Medicine, University of Campania Luigi Vanvitelli, Via L. De Crecchio 7, 80138 Naples, Italy; elisa.martino@unicampania.it (E.M.), nunzia.donofrio@unicampania.it (N.D.).

<sup>2</sup>Food Safety Department, Istituto Zooprofilattico Sperimentale del Mezzogiorno, 80055 Portici, Italy; anna.balestrieri@izsmpportici.it (A.B.).

<sup>3</sup>Department of Veterinary Medicine and Animal Production, University of Naples Federico II, 80137 Naples, Italy; francesca.aragona@unina.it (F.A.), giovanna.bifulco@unina.it, (G.B.), giuseppe.campanile@unina.it (G.C.).

<sup>4</sup>Department of Experimental Medicine, University of Campania Luigi Vanvitelli, Via Luciano Armanni 5, 80138 Naples, Italy; luigi.mele@unicampania.it (L.M.).

\*Correspondence: marialuisa.balestrieri@unicampania.it (M.L.B.); Tel.: +39-081-566-5865.

## **SUPPLEMENTARY MATERIALS**

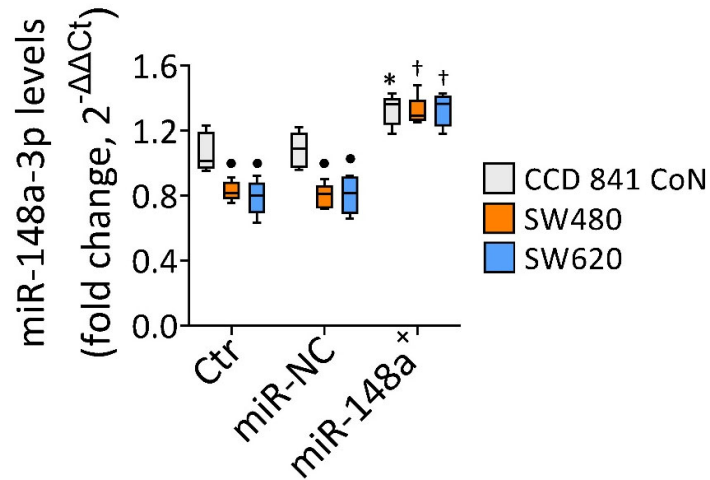

**Figure S1.** Expression levels of miR-148a-3p in mimic transfected cells. Hsa-miR-148a-3p expression, measured by qRT-PCR, in CCD 841 CoN, SW480 and SW620 cells transfected with miRNA mimic Negative Control (miR-NC) or hsa-miR-148a miRNA mimic (miR-148a<sup>+</sup>). Data are reported as floating bars with line representing the mean  $\pm$  SD of  $n = 3$  experiments. • $p < 0.05$  vs. CCD 841 CoN cells; \* $p < 0.05$  vs. miR-NC; † $p < 0.01$  vs. miR-NC.

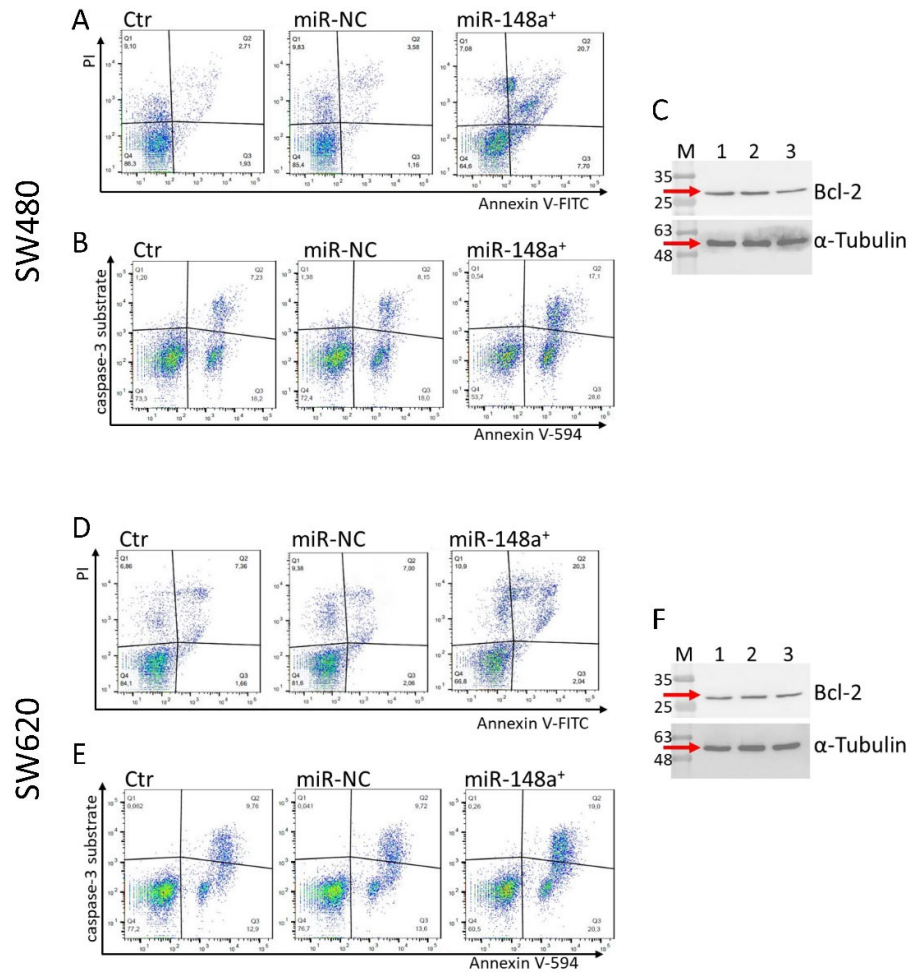

**Figure S2.** Apoptotic cell death analysis. Representative dot plots of (A,D) annexin V-FITC and PI-staining and (B,E) caspase-3 activation, and (C,F) cropped blots of immunoblotting analysis of Bcl-2 protein levels in SW480 and SW620 cells. Q1: necrotic cells; Q2: late apoptotic cells; Q3: early apoptotic cells; Q4: viable cells. M = molecular weight markers, lane 1 = Ctr, lane 2 = miR-NC, lane 3 = miR-148a<sup>+</sup>.

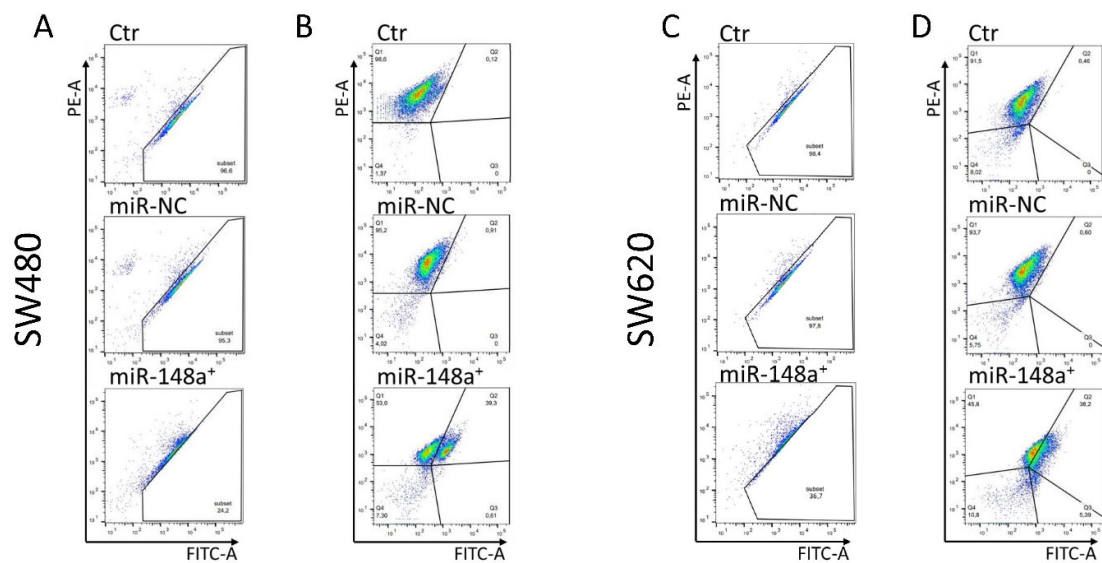

**Figure S3.** Mitochondrial evaluation by cytofluorimetric analysis. Representative FACS analysis of (A,C) mitochondrial integrity and (B,D) mitochondrial membrane potential in SW480 and SW620 cells.

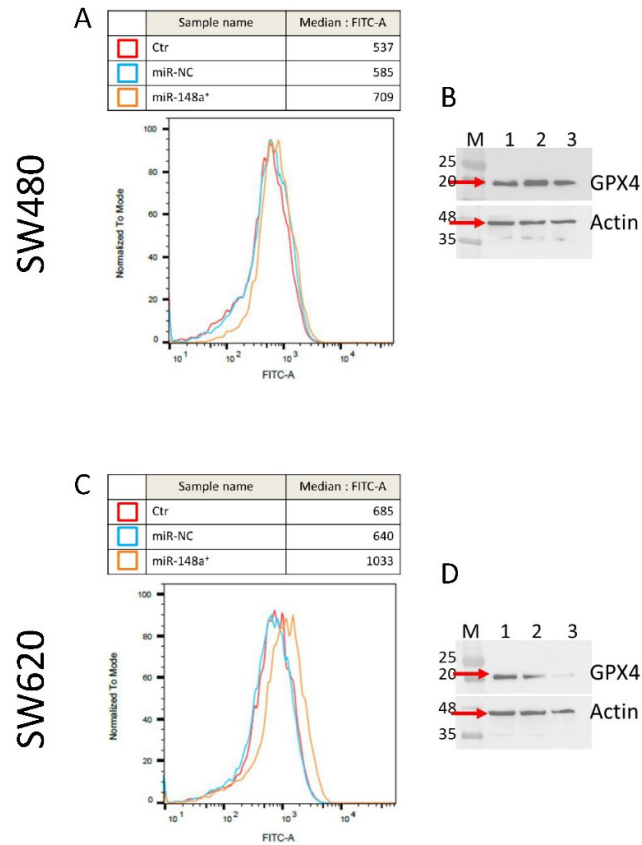

**Figure S4.** Lipid peroxidation evaluation. Representative FACS analysis of (A,C) lipid peroxide levels and (B,D) cropped blots of immunoblotting analysis of GPX4 protein levels in SW480 and SW620 cells. M = molecular weight markers, lane 1 = Ctrl, lane 2 = miR-NC, lane 3 = miR-148a<sup>+</sup>.

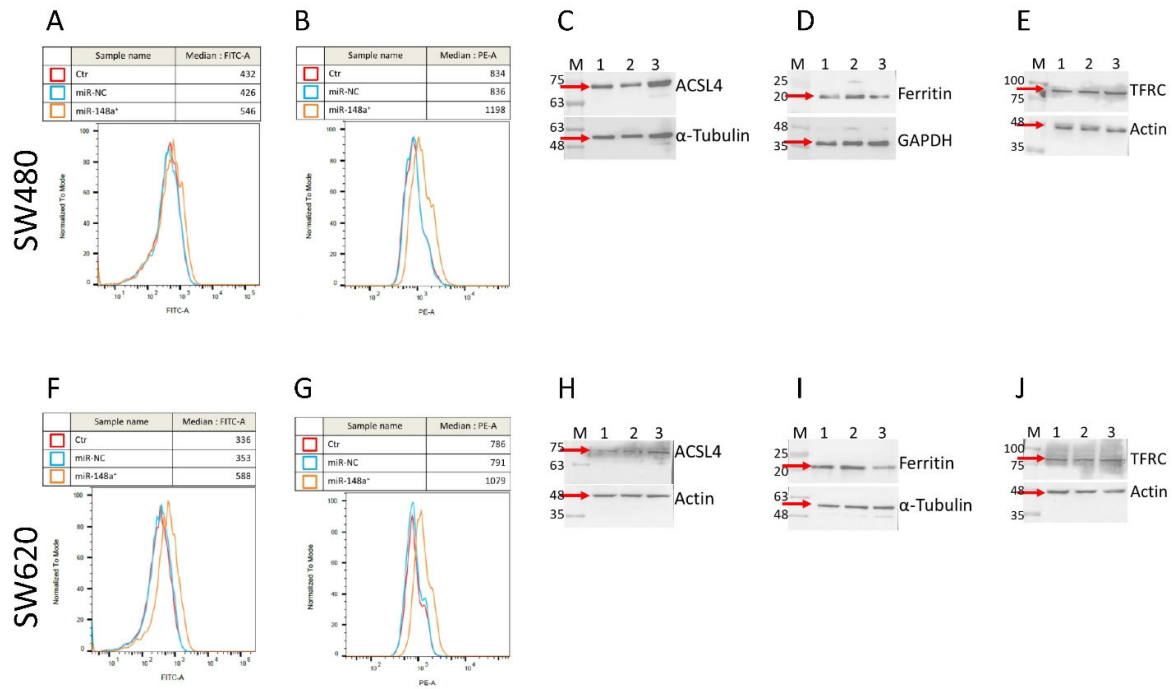

**Figure S5.** Ferroptosis analysis and markers. Representative FACS analysis of (A,F) mitochondrial  $\text{Fe}^{2+}$  content and (B,G) ferroptosis, and cropped blots of immunoblotting analysis of (C,H) ACSL4, (D,I) Ferritin and (E,J) TFRC protein levels in SW480 and SW620 cells. M = molecular weight markers, lane 1 = Ctrl, lane 2 = miR-NC, lane 3 = miR-148a<sup>+</sup>.

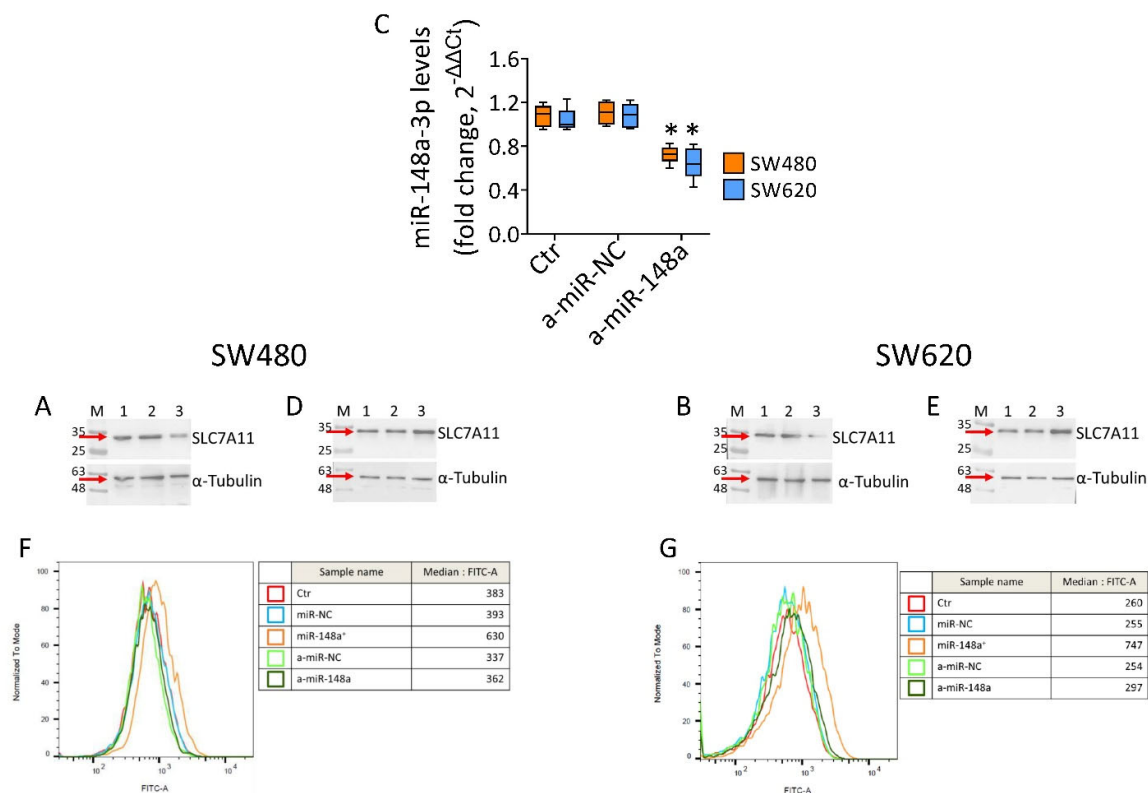

**Figure S6.** SLC7A11 and miR-148a-3p levels in agomir transfected cells. Representative cropped blots of immunoblotting analysis of SLC7A11 protein levels evaluated in SW480 and SW620 cells transfected with (A,B) miRNA mimic Negative Control (miR-NC) or hsa-miR-148a miRNA mimic (miR-148a<sup>+</sup>) or with (D,E) miRNA agomir Negative Control (a-miR-NC) or hsa-miR-148a miRNA agomir (a-miR-148a). M = molecular weight markers, lane 1 = Ctrl, lane 2 = miR-NC or a-miR-NC, lane 3 = miR-148a<sup>+</sup> or a-miR-148a. (C) Hsa-miR-148a-3p expression, measured by qRT-PCR, in SW480 and SW620 cells transfected with miRNA agomir Negative Control (a-miR-NC) or hsa-miR-148a miRNA agomir (a-miR-148a). Data are reported as floating bars with line representing the mean  $\pm$  SD of n = 3 experiments. \*p<0.05 vs. a-miR-NC. (F,G) Representative FACS analysis of lipid peroxide content in SW480 and SW620 cells.

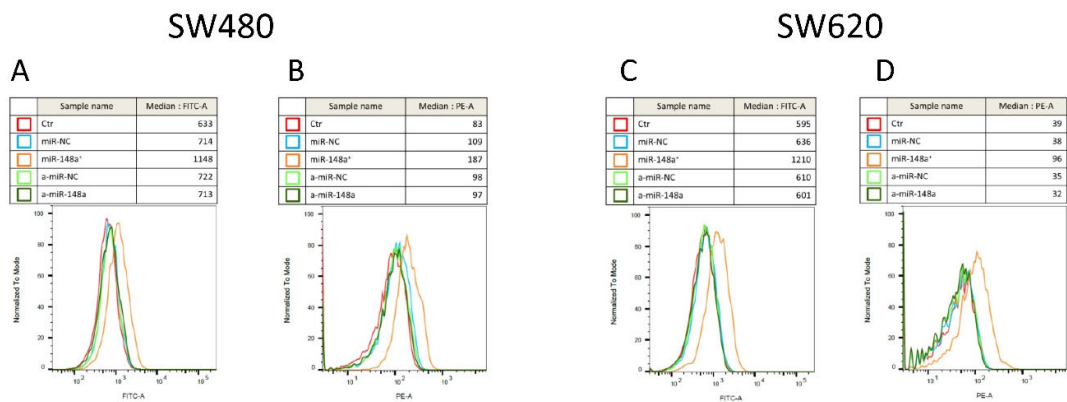

**Figure S7.** Cytofluorimetric analysis of ferroptosis. Representative FACS analysis of (A,C) mitochondrial  $\text{Fe}^{2+}$  content and (B,D) ferroptosis evaluated in SW480 and SW620 cells.
